# Supplementary material
Source: publisher site journal article supplement (https://www.spandidos-publications.com/2980/downloadSupplementary)
Supplement: Supplementary file 1 [file downloadSupplementary]

Figure S1. Between July 2004 and July 2019, 303 patients underwent esophagectomy in Fukushima Medical University Hospital, Fukushima, Japan. Among them, 106 patients with ESCC who had not received additional preoperative therapy were selected, with the exception of one patient who had no pathological specimen data.

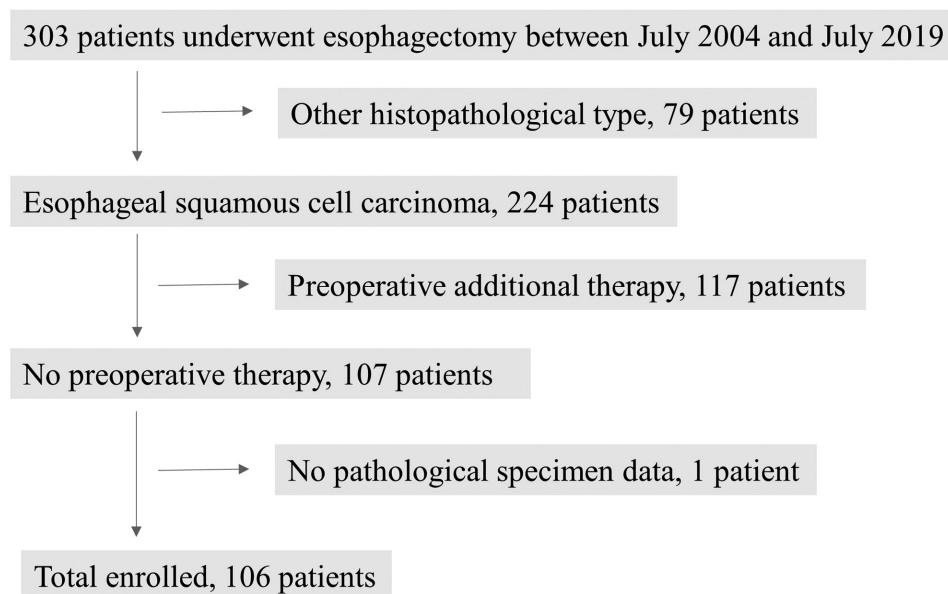

Figure S2. Versican, Periostin and Lumican expression locally matched with  $\alpha$ SMA, suggesting that cancer-associated fibroblasts express Versican, Periostin and Lumican.  $\alpha$ SMA,  $\alpha$ -smooth muscle actin.

$\alpha$ SMA

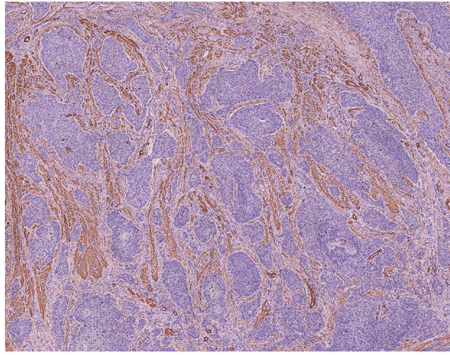

Versican

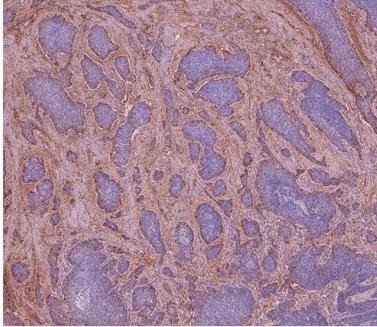

Periostin

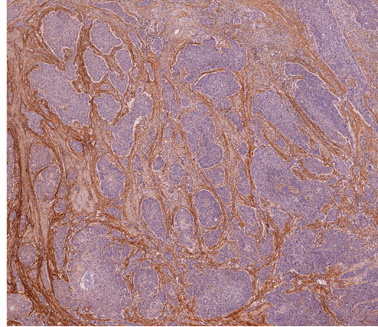

Lumican

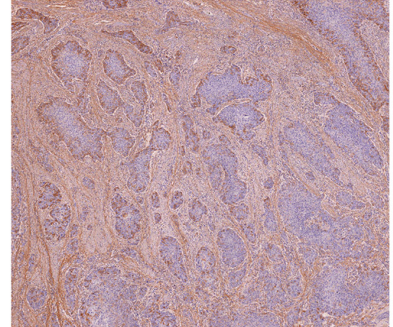

Figure S3. (A) High expression of stromal versican was associated with worse RFS compared with low expression in stage I and III patients. (B) Stromal periostin was not significantly different in stage I, III and IV, while the expression of stromal periostin in stage III was non-significantly associated with a poor prognosis. (C) High expression of stromal lumican was significantly associated with a poor prognosis in stage I patients.

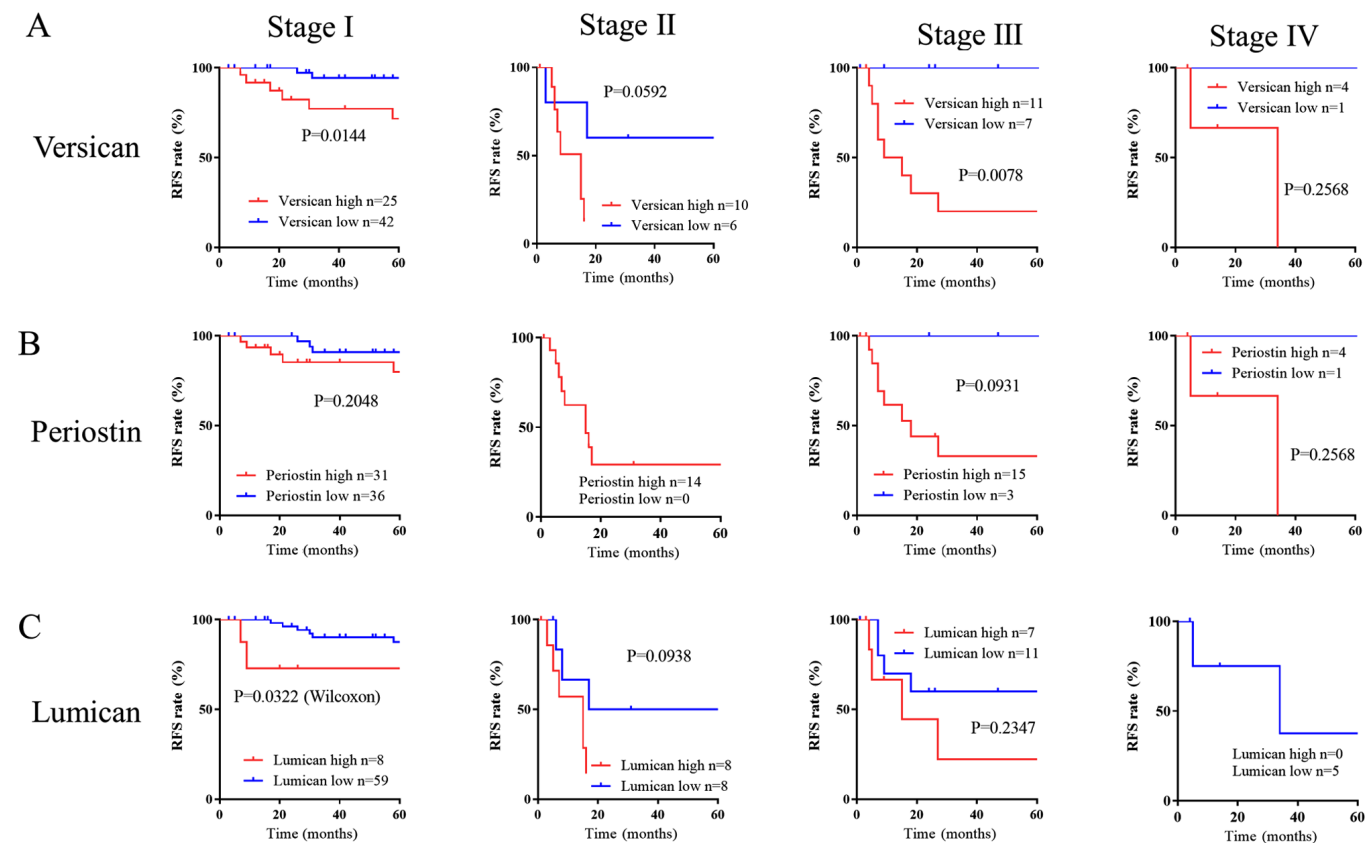

Table SI. Patient characteristics.

| Characteristic                      | Value                    |
|-------------------------------------|--------------------------|
| Age, years                          |                          |
| Range (mean $\pm$ SD)               | 37-81 (64.86 $\pm$ 8.55) |
| $\leq 60$ , n                       | 32                       |
| $\geq 61$ , n                       | 74                       |
| Sex, n                              |                          |
| Male                                | 93                       |
| Female                              | 13                       |
| Postoperative additional therapy, n |                          |
| No                                  | 86                       |
| Chemotherapy                        | 18                       |
| Radiotherapy                        | 2                        |
| Chemoradiotherapy                   | 0                        |
| Esophageal location, n              |                          |
| Upper                               | 15                       |
| Middle                              | 61                       |
| Lower                               | 30                       |
| Invasion depth, n                   |                          |
| pT1                                 | 74                       |
| pT2                                 | 13                       |
| pT3                                 | 18                       |
| pT4                                 | 1                        |
| Lymph node metastasis, n            |                          |
| Yes                                 | 40                       |
| No                                  | 66                       |
| Lymphatic invasion, n               |                          |
| Yes                                 | 49                       |
| No                                  | 57                       |
| Venous invasion, n                  |                          |
| Yes                                 | 57                       |
| No                                  | 49                       |
| TNM stage, n                        |                          |
| I                                   | 67                       |
| II                                  | 16                       |
| III                                 | 18                       |
| IV                                  | 5                        |

TNM, Tumor-Node-Metastasis.

Table SII. Association between stromal versican, periostin, lumican and  $\alpha$ SMA expression.

| Expression  | $\alpha$ SMA |            | P-value |
|-------------|--------------|------------|---------|
|             | High (n=43)  | Low (n=63) |         |
| Versican    |              |            | <0.0001 |
| High (n=50) | 33           | 17         |         |
| Low (n=56)  | 10           | 46         |         |
| Periostin   |              |            | <0.0001 |
| High (n=66) | 38           | 28         |         |
| Low (n=40)  | 5            | 35         |         |
| Lumican     |              |            | 0.0454  |
| High (n=23) | 14           | 9          |         |
| Low (n=83)  | 29           | 54         |         |

$\alpha$ SMA,  $\alpha$ -smooth muscle actin.
